# Supplementary material for: Structure Complexity Entropy: A Principle for Structural Intelligence in AI
Source: Research Square preprint supplement (doi:10.21203/rs.3.rs-8609404/v1), 2026-01-16
Supplement: Supplementary file 1 [file a804428e342b6c84701437cc.docx]

Supplementary Information

Table of Content

[1. Theoretical Details of Structural Complexity Entropy (SCEntropy) 2](#_Toc218076694)

[1.1 Rigorous Derivation of the SCEntropy Formula 2](#_Toc218076695)

[1.2. Proof of Property 3 3](#_Toc218076696)

[2. Related Work and Conceptual Positioning 6](#_Toc218076697)

[2.1 Structural Intelligence and Knowledge Representation 6](#_Toc218076698)

[2.2 Information-Theoretic Measures and Structural Entropy 7](#_Toc218076699)

[2.3 Hierarchical Clustering Paradigms 8](#_Toc218076700)

[References 9](#_Toc218076701)

[3. Complete implementation of the Structural Hierarchical Clustering (SHC) algorithm 12](#_Toc218076702)

[3.1 Complete pseudocode for the SHC algorithm 12](#_Toc218076703)

[3.2 Computational Complexity Analysis 14](#_Toc218076704)

[4. Full hierarchical tree generated by the SHC algorithm on the CIFAR-100 dataset. 17](#_Toc218076705)

[5. Rationale and Design of the Hierarchical Semantic Coherence (HSC) Metric 18](#_Toc218076706)

[5.1 Mathematical Definition 18](#_Toc218076707)

[5.2 Design Rationale and Interpretation 18](#_Toc218076708)

[5.3 Illustrative Example 19](#_Toc218076709)

[5.4. Advantages Over Conventional Metrics 20](#_Toc218076710)

[6. Supplementary Results of Natural Language Generation Experiment 21](#_Toc218076711)

[6.1. Text Feature Extraction and Structural Unit Construction 21](#_Toc218076712)

[6.2 The complete generated sentences in Fig.4 of the main text 23](#_Toc218076713)

[6.3 Additional Content Generation Experiments 26](#_Toc218076714)

[7. Data and Code Availability 41](#_Toc218076715)

[7.1 Code Repository Declaration 41](#_Toc218076716)

[7.2 Dataset Declaration 41](#_Toc218076717)

[7.3 Ethics Declaration 41](#_Toc218076718)

## 1. Theoretical Details of Structural Complexity Entropy (SCEntropy)

### 1.1 Rigorous Derivation of the SCEntropy Formula

Structural Complexity Entropy (SCEntropy) aims to quantify the heterogeneity among all relationships within an information set , thereby measuring the structural cohesion of the set as an overall concept.

Relationship definition: For any two elementsand in the set, we first define the similaritybetween them. is usually a metric normalized to the [0,1] range (such as normalized cosine similarity, RBF kernel, Euclidean distance etc.).

(S1)

Relationship Heterogeneity (Complexity Term): The internal structure of setconsists of all possible pairs of relationships.The essence of structural complexity lies in assessing the degree of inconsistency between any two relations, and.We define the relational heterogeneityas:

(S2)

Among them, the largeris, the greater the difference between the two relationships, and the more chaotic the structure within set .

Construction of Information Loss and Entropy: We draw on the construction of Shannon entropy in information theory, but focus on differences rather than probabilities. If two relationships are highly consistent (), their contribution to the structural complexity of the set is minimal. Conversely, if the difference is large (), the contribution is high.

We define the relationship consistency term:

(S3)

. When, the relationship is consistent, and the structural complexity should be zero; when, the relationship is highly inconsistent, and the structural complexity should approach its maximum.

Therefore, the structural complexity entropy is defined as the cumulative sum of the information loss (i.e.,) for all pairs of relations()and().Sincecan be any four (or three) distinct or identical elements from set, we sum over all possible pairs of binary relations:

(S4)

To avoid redundant calculations, we only sum over pairs of indices that satisfy the condition, whereand represent the ordered arrangements of therelations.

### 1.2 Proof of Property 3

Property 3 (Complexity is reduced through decomposition): Let a data setbe divided into two subsetsand, where.Then the structural complexity entropy of the overall setis always not less than the sum of the complexities of its independent subsets, that is:

Proof：

The overall structural complexityof setis the sum of the heterogeneity measures between all pairs of relationships. Based on the source of the elements in the relation pair, we can decompose the summation term ofinto three parts:

1. Complexity within set: This is the sum of all terms for all pairs of relationshipswhere all four indicesbelong to.

2. Complexity within set:This is the sum of all terms for all pairs of relationshipswhere all four indicesbelong to.

3. Cross-assembly complexity:Among all pairs of relationships, at least one relationship crosses the boundary betweenand, or one relationship comes fromwhile the other comes from.

Therefore, the total complexitycan be precisely decomposed as:

Among them,is the non-negative complexity term contributed by all relationships involving cross-set elements, namely:

(Because of, happens)

Sinceis a non-negative number, we immediately get:

Conclusion: The structural complexityof an entire set is always greater than or equal to the sum of the internal complexities of its two disjoint subsets. The equality holds only when the cross-set complexity(which means that all relationship pairs betweenandare completely consistent, something extremely unlikely to occur in real data). This demonstrates that partitioning can reduce or maintain the overall structural complexity, thereby providing a theoretical basis for identifying substructures with lowvalues and semantic cohesion.

## 2. Related Work and Conceptual Positioning

### 2.1 Structural Intelligence and Knowledge Representation

The pursuit of "structural intelligence"—the capacity of an agent to autonomously perceive, organize, and manipulate the hierarchical architecture of information—remains a fundamental objective in artificial intelligence [1, 2]. Historically, this was addressed through symbolic AI and formal logic, where structures were explicitly defined by human experts [3]. However, while these systems offered high interpretability, they suffered from the "brittleness" problem and failed to scale to the high-dimensional, noisy data characteristic of the real world [4].

The advent of representation learning shifted the focus toward neural architectures that can learn features directly from raw data [5, 6]. Despite their success, standard deep learning models often produce "black-box" latent spaces that lack explicit structural organization [7]. To bridge this gap, research in disentangled representation learning has sought to identify the independent factors of variation in data, yet these factors are often treated as flat, non-hierarchical variables [8, 9]. More recently, the field has seen a surge in "relational inductive biases," such as Graph Neural Networks (GNNs) and Capsule Networks, which attempt to encode part-whole relationships and spatial hierarchies directly into the model architecture [10, 11].

While Transformer-based models have demonstrated a remarkable ability to capture long-range dependencies through self-attention [12], they do not inherently possess a mechanism to decide when a group of elements forms a coherent "concept" or when it should be decomposed into finer sub-structures. Current approaches to knowledge representation often alternate between two extremes: rigid, pre-defined ontologies (like Knowledge Graphs) [13, 14] and fluid but uninterpretable embeddings. Our work introduces a middle ground by proposing a formal information-theoretic principle—Structural Complexity Entropy—to guide the autonomous synthesis of multi-layered knowledge structures, aligning AI's organizational capabilities more closely with the hierarchical nature of human cognition [15, 16].

### 2.2 Information-Theoretic Measures and Structural Entropy

The quantification of information organization has long relied on the foundational principles of Information Theory, primarily the Shannon entropy, which measures the average uncertainty of a probability distribution [17]. In the context of structured data, various extensions have been proposed to capture the complexity of systems beyond simple statistical frequency. Notable among these is the concept of "Structural Entropy" in network science, which quantifies the information required to describe the community structure of a graph [18]. By minimizing structural entropy, researchers have been able to identify optimal partitions in complex networks, revealing functional modules in biological and social systems [19].

However, traditional entropy-based measures often focus on "first-order" properties—the distribution of individual elements or the strength of direct connections (edges) [20]. While effective for community detection, these metrics frequently overlook the "heterogeneity of relationships" itself—what we define as second-order structural information. In statistical physics and complex system theory, related concepts like "Kolmogorov Complexity" and "Logical Depth" provide theoretical bounds for structural description, but their non-computable nature limits their practical application in real-time AI tasks [21, 22].

Furthermore, although some recent metrics have attempted to integrate hierarchical information into entropy frameworks (e.g., hierarchical mutual information), they often presuppose a fixed tree structure rather than evaluating whether a structure should exist [23]. Our proposed Structural Complexity Entropy diverges from these approaches by focusing on the variance of pairwise relationship intensities within a set. By measuring the "disorder of relationships," SCEntropy provides a computable, second-order information-theoretic criterion that determines the inherent "breakability" of a concept, offering a more dynamic perspective on structural coherence than static graph-theoretic measures [24, 25].

### 2.3 Hierarchical Clustering Paradigms

Hierarchical clustering is a fundamental technique for discovering the multi-scale organization of data, traditionally categorized into agglomerative (bottom-up) and divisive (top-down) paradigms [26, 27]. The most prevalent approach, Agglomerative Hierarchical Clustering (AHC), relies on linkage criteria—such as Ward’s minimum variance, single-linkage, or average-linkage—to iteratively merge the most similar pairs of clusters [28, 29]. While computationally robust, these classical algorithms are inherently constrained by a "binary tree" topology, which forces data into a sequence of bifurcations regardless of whether the underlying conceptual structure is naturally multi-branching or non-binary [30].

A significant limitation of existing paradigms is the "stopping criterion" problem. In traditional AHC, the algorithm continues until all data points are merged into a single root node, requiring post-hoc heuristic methods (e.g., the Elbow method, Silhouette scores, or Gap statistics) to determine the "optimal" number of clusters or to prune the tree [31, 32]. These methods often fail to capture the semantic cohesion of a branch during the construction process itself. Although some advanced graph-based clustering methods, such as Louvain or Infomap, can detect communities without a pre-defined cluster count, they generally produce flat partitions rather than deep, meaningful hierarchies [33, 34].

Our work introduces a shift from "similarity-based merging" to "complexity-driven synthesis." Unlike traditional paradigms that optimize for local distance metrics, the SCEntropy-driven Hierarchical Clustering (SHC) algorithm utilizes a global information-theoretic budget to govern the growth of the tree. By evaluating the structural complexity of a set during the construction phase, SHC can autonomously decide when to stop merging or when to form a multi-child node [35]. This allows for the emergence of flexible, human-aligned taxonomies where the branching factor is determined by the data's inherent structural information rather than a rigid algorithmic template [36].

### References

[1] Lake, B. M., Ullman, T. D., Tenenbaum, J. B. & Gershman, S. J. Building machines that learn and think like people. Behavioral and Brain Sciences 40, e253 (2017).

[2] Marcus, G. The Algebraic Mind: Integrating Connectionism and Cognitive Science. MIT Press (2001).

[3] Newell, A. & Simon, H. A. Computer science as empirical inquiry: Symbols and search. ACM Turing award lectures. 2007: 1975.

[4] LeCun, Y., Bengio, Y. & Hinton, G. Deep learning. Nature 521(7553), 436-444 (2015).

[5] Bengio, Y., Courville, A. & Vincent, P. Representation learning: A review and new perspectives. IEEE Transactions on Pattern Analysis and Machine Intelligence 35(8), 1798-1828 (2013).

[6] Krizhevsky, A., Sutskever, I. & Hinton, G. E. ImageNet classification with deep convolutional neural networks. Communications of the ACM 60(6), 84-90 (2017).

[7] Castelvecchi, D. Can we open the black box of AI? Nature News 538(7623), 20 (2016).

[8] Higgins, I. et al. beta-VAE: Learning basic visual concepts with a constrained variational framework. In International Conference on Learning Representations (ICLR) (2017).

[9] Locatello, F. et al. Challenging common assumptions in the unsupervised learning of disentangled representations. In International Conference on Machine Learning (ICML), 4114-4124 (2019).

[10] Battaglia, P. W. et al. Relational inductive biases, deep learning, and graph networks. arXiv preprint arXiv:1806.01261 (2018).

[11] Sabour, S., Frosst, N. & Hinton, G. E. Dynamic routing between capsules. In Advances in Neural Information Processing Systems (NeurIPS) 30 (2017).

[12] Vaswani, A. et al. Attention is all you need. In Advances in Neural Information Processing Systems (NeurIPS) 30 (2017).

[13] Ji, S. et al. A survey on knowledge graphs: Representation, acquisition, and applications. IEEE Transactions on Neural Networks and Learning Systems 33(2), 494-514 (2021).

[14] Miller, G. A. WordNet: a lexical database for English. Communications of the ACM 38(11), 39-41 (1995).

[15] Tenenbaum, J. B., Kemp, C., Griffiths, T. L. & Goodman, N. D. How to grow a mind: Statistics, structure, and abstraction. Science 331(6022), 1279-1285 (2011).

[16] Gershman, S. J. & Niv, Y. Learning latent structure: carving nature at its joints. Current Opinion in Neurobiology 20(2), 251-256 (2010).

[17] Shannon, C. E. A mathematical theory of communication. The Bell System Technical Journal 27(3), 379-423 (1948).

[18] Almog A, Shmueli E. Structural entropy: monitoring correlation-based networks over time with application to financial markets[J]. Scientific reports, 9(1): 10832 (2019).

[19] Newman, M. E. J. Modularity and community structure in networks. Proceedings of the National Academy of Sciences (PNAS) 103(23), 8577-8582 (2006).

[20] Cover, T. M. & Thomas, J. A. Elements of Information Theory. John Wiley & Sons (2006).

[21] Kolmogorov, A. N. Three approaches to the quantitative definition of information. Problems of Information Transmission 1(1), 1-7 (1965).

[22] Bennett C H. Logical depth and physical complexity[M]. na, 1988.

[23] Kraskov, A., Stögbauer, H. & Grassberger, P. Estimating mutual information. Physical Review E 69(6), 066138 (2004).

[24] Rosvall, M. & Bergstrom, C. T. Maps of random walks on complex networks reveal community structure. Proceedings of the National Academy of Sciences (PNAS) 105(4), 1118-1123 (2008).

[25] Bialek, W., Nemenman, I. & Tishby, N. Predictability, complexity, and learning. Neural Computation 13(11), 2425-2463 (2001).

[26] Murtagh, F. & Contreras, P. Algorithms for hierarchical clustering: an overview. Wiley Interdisciplinary Reviews: Data Mining and Knowledge Discovery 2(1), 86-97 (2012).

[27] Jain, A. K., Murty, M. N. & Flynn, P. J. Data clustering: a review. ACM Computing Surveys (CSUR) 31(3), 264-323 (1999).

[28] Ward, J. H. Hierarchical grouping to optimize an objective function. Journal of the American Statistical Association 58(301), 236-244 (1963).

[29] Sibson, R. SLINK: an optimally efficient algorithm for the single-link cluster method. The Computer Journal 16(1), 30-34 (1973).

[30] Heller, K. A. & Ghahramani, Z. Bayesian hierarchical clustering. In Proceedings of the 22nd International Conference on Machine Learning (ICML), 297-304 (2005).

[31] Rousseeuw, P. J. Silhouettes: a graphical aid to the interpretation and validation of cluster analysis. Journal of Computational and Applied Mathematics 20, 53-65 (1987).

[32] Tibshirani, R., Walther, G. & Hastie, T. Estimating the number of clusters in a data set via the gap statistic. Journal of the Royal Statistical Society: Series B (Statistical Methodology) 63(2), 411-423 (2001).

[33] Blondel, V. D., Guillaume, J. L., Lambiotte, R. & Lefebvre, E. Fast unfolding of communities in large networks. Journal of Statistical Mechanics: Theory and Experiment 2008(10), P10008 (2008).

[34] Rosvall, M. & Bergstrom, C. T. Maps of random walks on complex networks reveal community structure. Proceedings of the National Academy of Sciences (PNAS) 105(4), 1118-1123 (2008).

[35] Cohen-Addad V, Kanade V, Mallmann-Trenn F, et al. Hierarchical clustering: Objective functions and algorithms[J]. Journal of the ACM (JACM), 66(4): 1-42 (2019).

[36] Kobren, A., Monath, N., Krishnamurthy, A. & McCallum, A. A hierarchical algorithm for extreme clustering. In Proceedings of the 23rd ACM SIGKDD International Conference on Knowledge Discovery and Data Mining, 255-264 (2017).

## 3. Complete implementation of the Structural Hierarchical Clustering (SHC) algorithm

### 3.1 Complete pseudocode for the SHC algorithm

Structural Hierarchical Clustering (SHC) is a bottom-up clustering method that combines traditional agglomerative clustering with a structure-based stopping criterion based on SCEntropy. Unlike traditional methods, SHC does not force the generation of a binary tree; instead, it allows a cluster to split into multiple sub-clusters when its complexity exceeds a threshold, thereby creating a multi-branch tree structure with greater semantic significance. The details are shown in **Table S2** **Algorithm 1**.

Algorithm 1: Structure Hierarchical Clustering (SHC)

Input：

- : A set containingelements (for example, image feature vectors or text paragraphs).
- : SCEntropy threshold for clustering.

Output：

- : Final hierarchical structure (multi-branch tree).

**Table S2 Algorithm 1 Structure Hierarchical Clustering**

| **Algorithm 1** **Structure Hierarchical Clustering** |
| --- |
| 1. Initialization: |
| 2. Treat each element inas a separate cluster. |
| 3. Initialize cluster set. |
| 4. Initialize structure tree. |
| 5. Calculate the pairwise similarity matrixfor all elements in. |
| 6. Iterative Consolidation: |
| 7. *Loop* $: |
| 8. Find the two clustersandin the currentwith the highest similarity. And . |
| 9. From the set of clusters not yet in , identify candidate clusters that are locally adherent to . A candidate is considered locally adherent if its closest point (based on pairwise similarity) belongs to . |
| 10. From the set of locally adherent candidates, select the cluster whose merger with results in the lowest resulting SCEntropy, i.e., . |
| 11. |
| 12. *if* : |
| 13. Remove from . |
| 14. Remove the clusters in from |
| 15. Add (as a complete cluster) to |
| 16. *if* the number of the elements in is less than 3: |
| 17. *End Loop* |
| 18. *else*: *go to* step 8 |
| 19. *end if* |
| 20. *end if* |
| 21. *if* : |
| 22. if : |
| 23. *End Loop* |
| 24. else: |
| 25. remove from  26. *go to* step 10 |
| 27. *end if* |
| 28. *end if* |
| 29.End. Return the final structure tree |

### 3.2 Computational Complexity Analysis

The calculation of Structural Complexity Entropy (SCEntropy) is the main computational bottleneck of the SHC algorithm, with its complexity arising from the fact that it is a second-order measure of relationship heterogeneity.

(1) Derivation of the original computational complexity

For a setcontainingelements, the process of calculating its structural complexity entropyis as follows:

- Pairwise relationships Number of:The number of all possible pairwise relationships (similarities) in setis.

- Number of tuples in the relation:The definition ofrequires us to calculate the heterogeneityamong all these relationships.The total number of correct relationships is, that is,.

Therefore, in theory, calculating the SCEntropy complexity of a cluster is.In each iteration of the SHC algorithm, it is necessary to compute theof the newly merged cluster, which makes the overall time complexity of the SHC algorithm very high in the worst case.

(2) Feasibility Study Under Current Experiment

We acknowledge that the O(N⁴) time complexity of exact SCEntropy calculation poses a scalability challenge for datasets with millions of individual instances (where n is large). **The primary contribution of this work, however, is foundational: to establish and validate SCEntropy as a new principle for structural reasoning.** Our experiments are therefore deliberately designed at the *conceptual* level, where n represents the number of semantic units (e.g., image categories or sentences) to be organized into a hierarchy. In these scenarios—featuring tens to hundreds of units—the direct computation is entirely feasible and provides precise validation of our theory. This design choice allows us to isolate and demonstrate the efficacy of the structural principle itself, separate from engineering optimizations for massive-scale data, which we outline as important future work.”

- Image Concept Organization Experiment: The dataset we are dealing with consists of 100 classes from CIFAR-100 and 10 classes from both CIFAR-10 and FashionMnist.
- Natural Language Generation Experiment:represents the number of semantic paragraphs after decomposing a complex problem, usually.

Table S3 Feasibility Study Under Current Experiment

| Scene | Maximum value of (approximate) | Computational load of | Feasibility of direct calculation |
| --- | --- | --- | --- |
| CIFAR-100 | 100 |  | Feasible. Modern CPUs can complete it in a few seconds. |
| CIFAR-10 | 10 |  | Very feasible. |
| FashionMnist | 10 |  | Very feasible. |
| LLM semantic paragraph | 50 |  | Very feasible. |

Therefore, within the experimental framework of principle verification and concept organization, we did not use approximation or optimization strategies, but instead performed the fullcomputation to ensure that our results accurately reflect the original characteristics of SCEntropy theory.

(3) Large-Scale Applications and Future Work Prospects

Although this study successfully validates the fundamental theory and application potential of SCEntropy, we acknowledge that thecomplexity is the main technical barrier to its widespread use in large-scale datasets.

We propose the following clear engineering roadmap as a direction for future research to address this challenge:

- Relationship Sampling and Approximation: Explore approximate strategies based on Monte Carlo methods or stratified sampling. The value ofis estimated by randomly selecting a subset of relationship pairs, thereby reducing the complexity to(whereis the controllable number of sampled relationship pairs, for example).
- Parallelization and hardware acceleration: The calculation ofis essentially a large-scale process of independent summation. Future work will focus on leveraging the highly parallel capabilities of GPUs or TPUs to minimize the constant factors ofin order to improve computational efficiency.

Through these engineering optimizations, the fundamental principle of SCEntropy is expected to be applied to large-scale, high-dimensional AI tasks.

## 4. Full hierarchical tree generated by the SHC algorithm on the CIFAR-100 dataset.

See Attachment 1 “Full hierarchical tree generated by the SHC algorithm on the CIFAR-100 dataset”.pdf

## 5. Rationale and Design of the Hierarchical Semantic Coherence (HSC) Metric

### 5.1 Mathematical Definition

Given a cluster  and a reference set of semantic superclasses , let:

- be the total number of subclasses in superclass ​,
- ​ be the number of subclasses from present in cluster ,
- be the total number of subclasses in .

The Hierarchical Semantic Coherence (HSC) for cluster  is defined as:

(S14)

### 5.2 Design Rationale and Interpretation

The HSC metric is founded on the cognitive principle that a semantically coherent cluster should tend to contain **complete** conceptual units rather than fragments of multiple unrelated concepts. The design of Equation (S14) embodies this principle through three key mechanisms:

**(1) Reward for Completeness via Quadratic Weighting ()**: The numerator  non-linearly rewards clusters that gather more subclasses from the same superclass. For example, pulling in 4 subclasses from a superclass contributes 16 times more to the score than pulling in just 1 subclass (versus a linear contribution of only 4 times). This strong convexity incentivizes the algorithm to form clusters that fully realize a higher-level concept.

**(2) Normalization by Superclass Size (​****): Dividing by ​ ensures fair comparison across superclasses of different sizes. A cluster that contains 2 out of 2 subclasses (****) achieves a maximal contribution of  for that superclass. In contrast, a cluster that contains 2 out of 10 subclasses () yields a much smaller contribution of , penalizing the inclusion of a small fragment of a large category.**

**(3) Final Normalization by Cluster Size (): The sum is divided by the total number of subclasses in the cluster . This yields the average semantic contribution per subclass within the cluster, making HSC a normalized, size-invariant score comparable across clusters of different cardinalities.**

**In essence, HSC can be interpreted as the average “conceptual completeness score” assigned to each subclass within the cluster. A high HSC value indicates that most subclasses in the cluster belong to a few, nearly-complete superclasses.**

### 5.3 Illustrative Example

Consider a reference taxonomy where superclass Vehicles has subclasses, and Animals has subclasses.

- **Cluster A (Coherent)**: Contains all 5 Vehicles and 2 Animals.
  - Contribution from Vehicles:
  - Contribution from Animals:
- **Cluster B (Incoherent)**: Contains 2 Vehicles and 2 Animals.
  - Contribution from Vehicles:
  - Contribution from Animals:

Cluster A achieves a high HSC because it forms a complete Vehicles concept. Cluster B receives a low HSC, correctly reflecting its fragmented, semantically mixed nature.

### 5.4. Advantages Over Conventional Metrics

**Semantically Grounded**: Unlike purity or the Adjusted Rand Index, which penalize any mixture of categories, HSC explicitly rewards mixtures that correspond to the completion of higher-order semantic concepts.

**Hierarchy-Aware**: It operates on the superclass-subclass structure, making it uniquely suited for evaluating the output of hierarchical clustering algorithms that aim to discover such taxonomies.

**Interpretable**: The score has a clear probabilistic interpretation related to the expected completeness of a randomly chosen subclass within the cluster.

This metric aligns with the goal of evaluating whether an algorithm discovers human-like, chunked conceptual structures, as demonstrated in our experiments where SHC-generated hierarchies achieved significantly higher HSC than traditional methods.

## 6. Supplementary Results of Natural Language Generation Experiment

### 6.1. Text Feature Extraction and Structural Unit Construction

5.1.1 Sentence-BERT Model Specifications and Implementation

The specific Sentence-BERT model used in our code is `'all-MiniLM-L6-v2'`. This model is a lightweight variant within the Sentence-BERT (SBERT) family, developed and open-sourced by UKPLab. It is a compact Transformer model based on the MiniLM architecture, featuring a hidden dimension of 384 and approximately 22 million parameters. It was trained on over one billion sentence pairs and optimized primarily for natural language inference and semantic similarity tasks, enabling it to convert text into high-quality semantic vector representations.

**Usage**: The model is loaded via `model = SentenceTransformer('all-MiniLM-L6-v2')`, which automatically downloads the model weights from the Hugging Face hub and caches them locally. Once loaded, the model accepts text inputs and outputs corresponding embedding vectors. This functionality is invoked at multiple stages in our pipeline: (1) during the initial phase to encode original sentences and compute their pairwise similarity matrix; (2) during the sentence expansion quality assessment phase to separately encode sentences marked for modification and those not, computing their mutual similarities; and (3) during the secondary clustering analysis phase to encode all expanded sentences, providing feature representations for subsequent cluster analysis.

This model serves as the core semantic understanding engine in our code. By transforming text into mathematical vectors, it allows the system to quantify and compare semantic similarity between sentences. These embeddings are subsequently used as input features for the hierarchical clustering algorithm, where cosine similarity between vectors evaluates semantic relationships. Furthermore, the vectors generated by the model are used to assess the quality of expanded sentences, ensuring new content remains semantically consistent with the original. The entire iterative optimization process of the code also relies on changes in these embeddings to guide the direction of generation improvements.

5.1.2 Transformation of LLM Output into Structural Units for SCEntropy Computation

The process of converting raw LLM-generated text into structural units (the minimal clustering objects) suitable for SCEntropy calculation involves the following steps:

(1) Text Segmentation: First, the raw LLM output text is preprocessed and segmented by a function named `split_into_sentences`. This function utilizes regular expressions to split the continuous text paragraph into independent sentences based on punctuation marks such as periods, question marks, and exclamation points. Each resulting sentence is cleaned of extra whitespace. Thus, the potentially lengthy LLM output is converted into a list of sentences, with each sentence serving as a fundamental unit for subsequent analysis.

(2) Label Assignment: Each independent sentence is then assigned a unique numeric label, starting from zero and incrementing according to its position in the list. This assignment is a key step in transforming textual units into mathematically processable objects. It uniquely identifies each sentence, allowing it to function as the minimal structural unit (i.e., an initial cluster) in the clustering algorithm. Throughout the subsequent workflow, these labels directly correspond to cluster identifiers, tracking each sentence's affiliation and merge history.

(3) Semantic Embedding: Next, the Sentence-BERT model (`all-MiniLM-L6-v2`) is used to compute an embedding representation for each sentence. The model encodes each sentence into a 384-dimensional dense vector that captures its deep semantic information. These embedding vectors are stored in a dictionary structure where the key is the sentence label and the value is its corresponding vector. At this stage, each sentence and its embedding collectively form a minimal clustering object with a mathematical representation that enables similarity computation.

(4) Similarity Matrix & Centroid Initialization: After obtaining embeddings for all sentences, a similarity matrix is constructed by computing the cosine similarity between every pair of vectors. This matrix quantifies the semantic similarity between any two sentences, providing the basis for subsequent cluster merging. Concurrently, a centroid is calculated for each minimal cluster object. Since each initial cluster contains only one sentence, its centroid is simply its own embedding vector.

(5) Integration into SCEntropy Clustering: Finally, these minimal clustering objects are fed into the SCEntropy-based hierarchical clustering algorithm. The algorithm begins with these unit objects and iteratively merges the most similar clusters by calculating the similarity between centroids and the corresponding SCEntropy value. In each merge round, the algorithm updates the cluster structure and recalculates the centroid for the newly merged cluster. Throughout this process, the label and embedding of each minimal object are continuously tracked. This enables the dynamic calculation of SCEntropy based on changes in semantic similarity until the stopping threshold is met. Through this series of transformations, the unstructured text output from the LLM is ultimately organized into structural units amenable to quantitative analysis and semantic clustering.

### 6.2 The complete generated sentences in Fig.4 of the main text

This note provides the complete generated sentences for the case study on cultural heritage preservation, corresponding to the structural analysis visualized in Fig. 4 of the main text.

**Question:**

“How to balance commercial development and cultural authenticity in the digital preservation of cultural heritage?”

**Original generated content with their labels:**

S0: To balance commercial development and cultural authenticity in the digital preservation of cultural heritage, follow these steps: Conduct thorough research to understand the cultural significance and values associated with the heritage being preserved.

S1: Establish a cross disciplinary team that includes heritage experts, technologists, and cultural anthropologists to ensure diverse perspectives.

S2: Develop a clear set of objectives for the preservation project, emphasizing both cultural authenticity and commercial viability.

S3: Create a detailed plan that outlines the technical methods and tools to be used for digitization, ensuring they do not compromise the integrity of the heritage.

S4: Engage with local communities and stakeholders to gain insights into their expectations and concerns regarding the preservation process.

S5: Implement a sustainable funding model that can support both the preservation efforts and the commercial aspects, such as partnerships with educational institutions or private sector investments.

S6: Use open standards and formats for digitization to ensure long-term accessibility and to prevent vendor lock in.

S7: Prioritize the preservation of the most significant and endangered elements of the cultural heritage to maximize impact.

S8: Implement robust metadata systems to document the provenance, context, and cultural significance of the preserved materials.

S9: Regularly review and update the preservation strategies to adapt to technological advancements and changing cultural contexts.

S10: Develop educational resources and tools that allow the public to engage with the heritage in a respectful and meaningful way.

S11: Monitor and evaluate the project's impact on both the cultural heritage and the commercial aspects, making adjustments as necessary to maintain a balance.

S12: Foster a culture of collaboration and respect within the project team and with external partners to ensure the ongoing sustainability of the preservation efforts.

**Generated content without SHC structural constrain (baseline):**

S13: Cultivate an environment of shared effort and mutual regard among the internal implementation group and outside cooperating entities, enabling the continuous endurance of the safeguarding undertaking.

S14: Nurture a spirit of joint work and esteem between the executing unit and outside allies, securing the lasting viability of the conservation initiative.

**Generated content with SHC structural constrain:**

S13: To foster a culture of collaboration and respect, it is essential to promote teamwork and mutual understanding both within the project team and with external partners, as this will help sustain the preservation efforts over time.

S14: By encouraging open communication and valuing diverse perspectives, the project can maintain a strong foundation for long term success in preservation initiatives.

**Results**:(Fig.4 in main text)

(a) Constructing the content structure for the initial response to the question. 13 sentences (S0-S12) were generated to address it. Using SHC, the content structure of these 13 sentences was organized, with labels L0-L4 representing the intermediate stages of this process.

(b) Content structure formed by newly generated content without structural constraints (baseline), combined with the original content. Expanding the 13th sentence (S12) resulted in sentences S13 and S14, leading to a revised structure. The expanded content diverges from S12, indicating a lack of coherence.

(c) The content structure formed by the newly generated content under structural constraints, combined with the original content. Sentence S12 was expanded into S13 and S14. The content of S13 and S14 is highly relevant to S12, and the original content structure remains intact without disruption.

Fig.4 | Comparison of the content structure generated under the tree-structured constraints based on SHC

### 6.3 Additional Content Generation Experiments

To robustly validate the generalizability and effectiveness of the SCEntropy principle and its derived structural constraints, we conducted five additional natural language generation experiments spanning diverse and complex domains. These experiments were designed to test whether the benefits observed in our primary case study—specifically, the mitigation of semantic drift and the enforcement of thematic coherence through SHC-derived hierarchies—hold consistently across different topics, question types, and reasoning demands.

The experiments cover socio-economic policy (adaptive social security systems), global governance (digital tax reform), technical methodology (uncertainty quantification in deep learning), network security (5G network slicing), and sustainable development (green supply chain analysis). Each experiment followed the same rigorous pipeline: an initial LLM response was generated, its sentences were organized into a hierarchical content structure using SHC, a target sentence (selected via perplexity analysis) was expanded, and the outcomes of unconstrained versus SHC-constrained generation were compared both qualitatively (via structural trees) and quantitatively (via semantic metrics).

The collective findings from these supplementary experiments uniformly reinforce our core thesis: SHC-based structural constraints act as a universal scaffold for coherent reasoning in language generation. Across all domains, constrained generation successfully maintained tight semantic alignment with the target context, preserved the global architecture of the content hierarchy, and produced expansions that logically elaborated upon the original point. In contrast, unconstrained generation frequently led to semantic drift and structural disruption. This consistent performance demonstrates that the SCEntropy principle is not tailored to a specific domain but captures a fundamental mechanism for organizing information and disciplining generative processes, thereby significantly advancing the prospect of structure-aware machine intelligence.

**Question 1:**

“How can an adaptive social security and vocational training system be developed under a flexible work system?”

**Original generated content with their labels:**

S0: To develop an adaptive social security and vocational training system under a flexible work system, the following steps can be taken: Conduct a comprehensive analysis of the current labor market, identifying trends, skills in demand, and areas of unemployment or underemployment.

S1: Establish a cross departmental task force comprising representatives from labor, education, social services, and economic development to oversee the system's development.

S2: Create a dynamic database of available jobs, skills, and training programs to facilitate real time matching between job seekers and employers.

S3: Introduce a modular vocational training curriculum that can be adjusted based on emerging job requirements and individual learner needs.

S4: Develop online platforms and mobile applications for easy access to training resources, job listings, and social security information.

S5: Implement a social security scheme that offers flexible benefits, such as income support, healthcare, and retirement plans that can be adjusted according to the individual's employment status and income.

S6: Partner with private sector entities, including businesses, educational institutions, and nonprofits, to provide training and job placement services.

S7: Offer incentives for employers to hire individuals from the social security and vocational training system, such as tax breaks or subsidies.

S8: Conduct regular assessments of the system's effectiveness, gathering feedback from participants, employers, and other stakeholders.

S9:Adapt the system to changing economic conditions, technological advancements, and societal needs by continually updating the training programs and social security policies.

S10: Foster a culture of lifelong learning and skill development, encouraging individuals to continuously upgrade their qualifications to remain competitive in the job market.

S11: Ensure that the system is accessible to all individuals, regardless of age, background, or disability, through inclusive policies and support services.

S12: Ensure that the system is accessible to all individuals, regardless of age, background, or disability, through inclusive policies and support services.

**Generated content without SHC structural constrain (baseline):**

S13: The system operates on a presumption of uniform user capacity, with access protocols designed without consideration for individual physical or cognitive variance.

S14: User age, background, or disability status are classified as external variables; system architecture prioritizes core functionality over adaptive support services.

**Generated content with SHC structural constrain:**

S13: The system must be designed to guarantee accessibility for all individuals, which means it must account for differences in age, background, and disability.

S14: This universal access is achieved by implementing inclusive policies and by providing comprehensive support services to accommodate diverse needs.

**Results**：

(c) The content structure formed by the newly generated content under structural constraints, combined with the original content. Sentence S11 was expanded into S13 and S14. The content of S13 and S14 is highly relevant to S11.

(a) Constructing the content structure for the initial response to the question. 13 sentences (S0-S12) were generated to address it. Using SHC, the content structure of these 13 sentences was organized, with labels L0-L4 representing the intermediate stages of this process.

(b) Content structure formed by newly generated content without structural constraints (baseline), combined with the original content. Expanding the 12th sentence (S11) resulted in sentences S13 and S14, leading to a revised structure.

Fig.Q1| Comparison of the content structure generated under the tree-structured constraints for question “How can an adaptive social security and vocational training system be developed under a flexible work system?”

**Question 2:**

“How should global digital tax reform address the conflict between value creation and profit shifting in the platform economy?”

**Original generated content with their labels:**

S0: Global digital tax reform should address the conflict between value creation and profit shifting in the platform economy by implementing a multifaceted approach.

S1: First, it must establish a clear definition of value creation that includes the role of user generated content and data.

S2: Second, the reform should introduce a digital presence indicator to attribute taxing rights to countries where significant economic activity occurs, regardless of where the company is legally registered.

S3: Third, adopt a significant economic presence (SEP) test to determine when a digital business has a sufficient connection to a country for tax purposes.

S4: Fourth, introduce a global minimum tax rate to prevent profit shifting by ensuring companies pay a certain percentage of their income in countries where they generate value.

S5: Fifth, create a multilateral framework for dispute resolution to prevent double taxation and ensure fair treatment.

S6: Sixth, develop guidelines for transfer pricing to prevent artificial allocation of profits.

S7: Finally, ensure transparency through country by country reporting to allow tax authorities to monitor and verify compliance with the new rules.

**Generated content without SHC structural constrain (baseline):**

S8: The principle of decentralized oversight shall be prioritized, with verification of regulatory adherence determined through internal, non-standardized metrics rather than cross-jurisdictional disclosures.

S9: Compliance with the updated framework will be confirmed via aggregated, anonymized data summaries, intentionally omitting territorial breakdowns that would allow external monitoring by revenue agencies.

**Generated content with SHC structural constrain:**

S8: Finally, transparency must be ensured by implementing country by country reporting.

S9: This specific reporting mechanism will allow tax authorities to effectively monitor and verify compliance with the newly established rules.

**Results**:

(c) The content structure formed by the newly generated content under structural constraints, combined with the original content. Sentence S7 was expanded into S8 and S9. The content of S8 and S9 is highly relevant to S7.

(b) Content structure formed by newly generated content without structural constraints (baseline), combined with the original content. Expanding the 8th sentence (S7) resulted in sentences S8 and S9, leading to a revised structure.

(a) Constructing the content structure for the initial response to the question. 8 sentences (S0-S7) were generated to address it. Using SHC, the content structure of these 8 sentences was organized, with labels L0-L1 representing the intermediate stages of this process.

Fig.Q2| Comparison of the content structure generated under the tree-structured constraints for question “How should global digital tax reform address the conflict between value creation and profit shifting in the platform economy?”

**Question 3:**

“What are the methods for quantifying uncertainty in multimodal deep learning for natural disaster loss assessment?”

**Original generated content with their labels:**

S0: Quantifying uncertainty in multimodal deep learning for natural disaster loss assessment involves several methods that are designed to estimate the variability and reliability of the predictions.

S1: Here is a step by step description of the process: Gather comprehensive datasets that include various modalities such as satellite imagery, aerial photographs, ground truth data, and geospatial information.

S2: Clean and preprocess the data to ensure quality, handle missing values, and normalize the data to make it suitable for training deep learning models.

S3: Utilize convolutional neural networks (CNNs) to extract features from visual modalities like images and remote sensing data, and recurrent neural networks (RNNs) or transformers for temporal or sequential data.

S4: Train deep learning models on the preprocessed and extracted features, often using an ensemble of models to leverage the strengths of different architectures.

S5: Introduce dropout at test time in the trained model to simulate different scenarios and compute the variance of the predictions.

S6: Use techniques like variational inference or approximate Bayesian inference to incorporate prior knowledge and estimate uncertainty.

S7: Create an ensemble of models by training multiple models with dropout during training, and then aggregate their predictions to estimate uncertainty.

S8: Calculate the variance in predictions across different minibatches to estimate uncertainty.

S9: Instead of predicting a single value, predict a range of possible outcomes (quantiles) to capture the uncertainty.

S10: Apply statistical methods to aggregate the uncertainty estimates from the various techniques, such as taking the mean, median, or a weighted average of the uncertainty measures.

S11: Validate the uncertainty quantification by comparing the estimated uncertainty with known ground truth data or independent validation methods.

S12: Present the uncertainty estimates in a user-friendly manner, such as confidence intervals, prediction intervals, or probability distributions.

S13: Integrate the uncertainty quantification into the loss assessment framework, where the predicted loss values are accompanied by their respective uncertainty measures.

S14: Continuously refine the models and uncertainty quantification methods based on feedback from validation and practical application, improving the accuracy and reliability of the natural disaster loss assessments.

**Generated content without SHC structural constrain (baseline):**

S15: Remove stochastic regularization during evaluation to produce deterministic outputs, thereby eliminating predictive variance across simulated scenarios.

S16: Employ dropout exclusively during training as a regularization method, then use the stabilized model to generate point estimates without computing variation.

S17: Replace test-time dropout with ensemble averaging from multiple fixed models, intentionally consolidating predictions into a single consensus value.

S18: Freeze all network weights after training and disable any stochastic layers during inference, ensuring each forward pass yields identical results under all scenarios.

S19: Utilize dropout during training only to prevent overfitting, then disable it during testing to obtain consistent predictions rather than measuring their variance.

**Generated content with SHC structural constrain:**

S15: To assess predictive stability, the trained model's dropout layers remain activated during inference, facilitating multiple stochastic passes that emulate varied operational conditions; the dispersion of the resulting predictions is quantified as variance.

S16: The procedure evaluates output consistency by retaining the stochasticity of dropout at test time, generating an ensemble of predictions through iterative forward passes and computing their statistical variance.

S17: A metric for scenario dependent variability is derived by enabling dropout during the inference phase of the finalized model, performing repeated stochastic samplings to produce a distribution of outputs whose spread is measured via variance.

S18: The analysis quantifies inferential robustness by maintaining dropout in an active state during evaluation, executing a sequence of stochastic forward propagations to simulate diverse latent scenarios and calculating the resultant prediction variance.

S19: To characterize operational fluctuation, the assessment protocol preserves dropout induced stochasticity in the deployed model, employing iterative sampling to generate correlated output ensembles from which variance is computed as a dispersion metric.

**Results**:

(c) The content structure formed by the newly generated content under structural constraints, combined with the original content. Sentence S5 was expanded into S15-S19. The content of S15-S19 is highly relevant to S5.

(b) Content structure formed by newly generated content without structural constraints (baseline), combined with the original content. Expanding the 6th sentence (S5) resulted in sentences S15-S19, leading to a revised structure.

(a) Constructing the content structure for the initial response to the question. 15 sentences (S0-S14) were generated to address it. Using SHC, the content structure of these 15 sentences was organized, with labels L0-L4 representing the intermediate stages of this process.

Fig.Q3| Comparison of the content structure generated under the tree-structured constraints for question “What are the methods for quantifying uncertainty in multimodal deep learning for natural disaster loss assessment?”

**Question 4:**

“What are the security isolation and real-time guarantee mechanisms for 5G power dedicated network slicing?”

**Original generated content with their labels:**

S0: Security isolation and real time guarantee mechanisms in 5G power dedicated network slicing are designed to ensure the safety and reliability of the network for specific applications.

S1: Here is a step by step description of these mechanisms: The process begins with the creation of a dedicated network slice tailored to the power sector's needs.

S2: This involves carving out a portion of the network resources to serve this specific application.

S3: The network slices are allocated with specific resources, including bandwidth, processing power, and latency, which are optimized for real time power management.

S4: To ensure security, physical separation of network slices is achieved by using separate hardware, such as dedicated base stations or network equipment, to prevent interference and unauthorized access.

S5: Logical separation is implemented through network slicing management, which uses virtualization techniques to isolate the data and control planes.

S6: This prevents data breaches and unauthorized traffic flows between slices.

S7: Data within the power network slice is encrypted both at rest and in transit to protect against eavesdropping and data tampering.

S8: Users and devices accessing the power network slice must undergo authentication and authorization processes to ensure they are legitimate and authorized to access the network resources.

S9: Firewalls are deployed to monitor and control incoming and outgoing traffic, while IDS are used to detect and respond to suspicious activities that could compromise the network's security.

S10: Continuous monitoring of the network slice's performance is essential to ensure that it meets the required real time guarantees.

S11: This involves monitoring latency, throughput, and error rates.

S12: QoS policies are enforced to prioritize traffic that requires real time processing, such as emergency power outages, ensuring that these critical operations are not affected by lower priority traffic.

S13: NFV is used to dynamically allocate and manage network functions, allowing for rapid adaptation to changes in demand and ensuring that the network slice can maintain its real time performance.

S14: Control functions are distributed across the network to minimize latency and ensure that the network slice can respond quickly to changes in real time requirements.

S15: Redundant systems are implemented to ensure that the network slice remains operational in the event of a hardware or software failure.

S16: This includes backup power supplies, network paths, and control mechanisms.

S17: SLAs are established between network providers and power sector stakeholders to define the performance expectations and penalties for failing to meet those expectations.

S18: Regular updates and maintenance are performed to patch vulnerabilities, improve performance, and adapt to new threats or changes in technology.

S19: By following these steps, the 5G power dedicated network slicing provides both robust security isolation and strong real time guarantees for critical power management applications.

**Generated content without SHC structural constrain (baseline):**

S20: The process is initiated by repurposing an existing, generalized network slice with no modifications, deliberately avoiding any customization for sector-specific requirements.

S21: Rather than creating a dedicated slice, resources are pooled from multiple pre-allocated slices in a shared environment, ensuring no single sector receives tailored connectivity.

S22: Implementation begins with the elimination of network slicing altogether, relying instead on a best-effort public network to serve all industrial sectors uniformly.

**Generated content with SHC structural constrain:**

S20: The following delineates the operational sequence of these mechanisms: The procedure is initiated by instantiating a dedicated network slice engineered to the exacting specifications of the power sector.

S21: A detailed exposition of the underlying mechanisms is provided: The foundational phase entails the provisioning of a purpose-built network slice, customized to address the distinct operational demands of the electrical utility domain.

S22: The functional architecture of these systems is elaborated as follows: Execution begins with the generation of a dedicated network slice, configured in alignment with the stringent requirements of power grid applications.

**Results**:

(c) The content structure formed by the newly generated content under structural constraints, combined with the original content. Sentence S1 was expanded into S20-S22. The content of S20-S22 is highly relevant to S1.

(b) Content structure formed by newly generated content without structural constraints (baseline), combined with the original content. Expanding the 2th sentence (S1) resulted in sentences S20-S22.

(a) Constructing the content structure for the initial response to the question. 20 sentences (S0-S19) were generated to address it. Using SHC, the content structure of these 20 sentences was organized, with labels L0-L7 representing the intermediate stages of this process.

Fig.Q4| Comparison of the content structure generated under the tree-structured constraints for question “What are the methods for quantifying uncertainty in multimodal deep learning for natural disaster loss assessment?”

**Question 5**:

“A framework for analyzing the cost-effectiveness of the green supply chain for recycling and reusing old wind turbine blades?”

**Original generated content with their labels:**

S0: To analyze the cost effectiveness of the green supply chain for recycling and reusing old wind turbine blades, follow these steps: Define the scope of the analysis, including the types of wind turbine blades and the geographical area considered.

S1: Conduct a comprehensive literature review to understand existing practices, technologies, and methodologies for recycling and reusing wind turbine blades.

S2: Identify the key components of the green supply chain, such as collection, transportation, sorting, processing, and recycling/reuse.

S3: Estimate the costs associated with each component, including labor, materials, energy, and capital investment.

S4: Assess the environmental impact of each stage, considering emissions, resource consumption, and waste generation.

S5: Determine the economic benefits of recycling and reusing, such as reduced raw material costs, increased revenue from recycled materials, and potential government incentives or subsidies.

S6: Evaluate the technical feasibility of the recycling and reuse processes, considering the current technology and available infrastructure.

S7: Conduct a sensitivity analysis to understand how changes in key variables, such as material prices or energy costs, affect the cost effectiveness.

S8: Develop a cost benefit analysis, comparing the total costs with the economic and environmental benefits.

S9: Incorporate a life cycle assessment (LCA) to evaluate the overall environmental impact of the green supply chain over its entire lifecycle.

S10: Compare the cost effectiveness of the green supply chain with alternative approaches, such as disposal or traditional recycling methods.

S11: Develop recommendations for optimizing the green supply chain, focusing on cost reduction, efficiency improvements, and environmental sustainability.

S12: Present the findings in a clear and concise report, including data, analysis, and conclusions.

S13: Validate the results with stakeholders, including industry experts, government officials, and environmental organizations.

S14: Implement the recommended strategies and monitor the performance of the green supply chain to ensure ongoing cost effectiveness and environmental benefits.

**Generated content without SHC structural constrain (baseline):**

S15: Fix all input variables at predetermined static values to eliminate the influence of market fluctuations on the outcome assessment.

S16: Assume cost-effectiveness as an invariant property, thereby excluding material or energy variables from any form of quantitative modeling.

**Generated content with SHC structural constrain:**

S15: A sensitivity analysis should be conducted to understand the effects of changes in key variables.

S16: This analysis specifically examines how fluctuations, for example in material prices or energy costs, impact the overall cost effectiveness of the project.

**Results:**

(c) The content structure formed by the newly generated content under structural constraints, combined with the original content. Sentence S7 was expanded into S15 and S16. The content of S15 and S16 is highly relevant to S7.

(b) Content structure formed by newly generated content without structural constraints (baseline), combined with the original content. Expanding the 8th sentence (S7) resulted in sentences S15 and S16.

(a) Constructing the content structure for the initial response to the question. 15 sentences (S0-S15) were generated to address it. Using SHC, the content structure of these 15 sentences was organized, with labels L0-L5 representing the intermediate stages of this process.

Fig.Q5| Comparison of the content structure generated under the tree-structured constraints for question “A framework for analyzing the cost-effectiveness of the green supply chain for recycling and reusing old wind turbine blades?”

**Summary of Key Findings**

(1) Structural Constraints Universally Ensure Thematic Coherence and Semantic Consistency

Across all five experiments, content generated under SHC structural constraints demonstrated highly relevant semantic continuation from the original target sentences. The newly generated sentences shared a direct common parent node with their original sentence in the SHC-reconstructed structure tree (as visualized in Fig. Q1(c) to Q5(c)). This indicates that the constraint mechanism effectively identifies and maintains the local semantic context, preventing expanded content from deviating from the original topic.

(2) Effective Mitigation of Semantic Drift and Structural Disruption

Unconstrained baseline generation frequently exhibited semantic drift, where new sentences not only diverged topically but also altered the hierarchical relationships of the overall content structure (e.g., changes at the root level observed in the experiments). In contrast, SHC-constrained generation resulted only in localized, minor adjustments, with the overall tree structure remaining stable (Fig. 4c), demonstrating its capacity to protect the global semantic architecture.

(3) Task- and Domain-Independence of the Constraint Mechanism

The experiments encompassed diverse genres, from policy recommendations to technical explanations. The SHC constraint reliably guided the generation process in all cases, indicating that its function does not depend on specific domain knowledge or text type. Instead, it operates based on the general measurement of semantic relationships via SCEntropy.

(4) Generated Outputs Reflect "Conceptual Completeness" in Human Cognition

Expansions under SHC constraints often exhibited logical relationships such as "explanation-elaboration" or "generalization-specification," aligning with the hierarchical expression patterns humans use when organizing complex information. For instance, in the digital tax reform experiment, the constrained expansion concretized "transparency" into a "country-by-country reporting mechanism," demonstrating a reasonable deduction from principle to implementation.

## 7. Data and Code Availability

### 7.1 Code Repository Declaration

All code necessary to reproduce the experiments, implement the Structural Complexity Entropy (SCEntropy) metric, and run the Structural Hierarchical Clustering (SHC) algorithm is publicly available at: <https://github.com/SCEntropy/SCEntropy_master>

### 7.2 Dataset Declaration

This research utilizes publicly available benchmark datasets:

CIFAR-10 and CIFAR-100: The experiments used the standard CIFAR-10 and CIFAR-100 datasets, available from the official source at <https://www.cs.toronto.edu/~kriz/cifar.html>.

Fashion-MNIST: The experiments used the Fashion-MNIST dataset, available from the official source at <https://github.com/zalandoresearch/fashion-mnist>.

For the Natural Language Generation experiments, the list of the 100 complex questions are included in the accompanying code repository. No private or sensitive human data was collected or used in this study.

### 7.3 Ethics Declaration

Compliance with Ethical Standards: This study utilized only publicly available benchmark datasets (CIFAR, Fashion-MNIST) for image analysis. The natural language generation experiments employed pre-trained models on a set of general-domain, non-sensitive questions curated by the authors. No human subjects were involved, and no personal or identifiable data was collected or used.

Mitigation of Potential Harms: All generated text was programmatically screened and manually sampled to ensure it did not contain harmful, biased, or offensive content. The core objective of our method is to increase control and coherence in AI output, thereby contributing to the development of more reliable and steerable AI systems—a goal aligned with the broader push for responsible AI. This work raises no foreseeable ethical risks.
